# Supplementary material for: Immunogenicity, Safety, and Immune Persistence of One Dose of SARS-CoV-2 Recombinant Adenovirus Type-5 Vectored Vaccine in Children and Adolescents Aged 6–17 Years: An Immunobridging Trial
Source: MDPI journal article supplement (doi:10.3390/vaccines12060683), 2024-06-19
Supplement: s1 [file s1]

Supplementary Table S5. Local or systemic adverse reactions occurred within 7 days after the vaccination across three batch group (13-17 years old)

|                                  |  | 800L Batch1 |           | 800L Batch2 |           | 800L Batch3 |           | Total      |           | P      |
|----------------------------------|--|-------------|-----------|-------------|-----------|-------------|-----------|------------|-----------|--------|
|                                  |  | (N=169)     |           | (N=167)     |           | (N=168)     |           | (N=504)    |           |        |
|                                  |  | n(%)        | Frequency | n(%)        | Frequency | n(%)        | Frequency | n(%)       | Frequency |        |
| Any                              |  | 70(41.42)   | 140       | 56(33.53)   | 110       | 55(32.74)   | 101       | 181(35.91) | 351       | 0.185  |
| Local adverse reactions          |  | 34(20.12)   | 40        | 32(19.16)   | 38        | 28(16.67)   | 33        | 94(18.65)  | 111       | 0.703  |
| Pain at the injection site       |  | 34(20.12)   | 34        | 32(19.16)   | 32        | 27(16.07)   | 27        | 93(18.45)  | 93        | 0.606  |
| Induration at the injection site |  | 0           | 0         | 2(1.20)     | 2         | 4(2.38)     | 4         | 6(1.19)    | 6         | 0.112  |
| Itching at the injection site    |  | 3(1.78)     | 3         | 1(0.60)     | 1         | 1(0.60)     | 1         | 5(0.99)    | 5         | 0.627  |
| Erythema at the injection site   |  | 2(1.18)     | 2         | 2(1.20)     | 2         | 0           | 0         | 4(0.79)    | 4         | 0.478  |
| Swelling at the injection site   |  | 1(0.59)     | 1         | 1(0.60)     | 1         | 1(0.60)     | 1         | 3(0.60)    | 3         | >0.999 |
| Systemic adverse reactions       |  | 55(32.54)   | 100       | 38(22.75)   | 72        | 39(23.21)   | 68        | 132(26.19) | 240       | 0.07   |
| Fever                            |  | 51(30.18)   | 52        | 29(17.37)   | 30        | 29(17.26)   | 29        | 109(21.63) | 111       | 0.004  |
| Fatigue                          |  | 13(7.69)    | 13        | 10(5.99)    | 10        | 9(5.36)     | 9         | 32(6.35)   | 32        | 0.661  |
| Headache                         |  | 11(6.51)    | 11        | 12(7.19)    | 12        | 9(5.36)     | 9         | 32(6.35)   | 32        | 0.786  |
| Nausea                           |  | 3(1.78)     | 3         | 3(1.80)     | 3         | 4(2.38)     | 4         | 10(1.98)   | 10        | 0.927  |
| Vomit                            |  | 4(2.37)     | 4         | 1(0.60)     | 1         | 5(2.98)     | 5         | 10(1.98)   | 10        | 0.342  |
| Anorexia                         |  | 4(2.37)     | 4         | 3(1.80)     | 3         | 3(1.79)     | 3         | 10(1.98)   | 10        | >0.999 |
| Oropharyngeal pain               |  | 1(0.59)     | 1         | 4(2.40)     | 4         | 1(0.60)     | 1         | 6(1.19)    | 6         | 0.296  |
| Arthralgia                       |  | 3(1.78)     | 3         | 1(0.60)     | 1         | 1(0.60)     | 1         | 5(0.99)    | 5         | 0.627  |
| Myalgia                          |  | 3(1.78)     | 3         | 0           | 0         | 2(1.19)     | 2         | 5(0.99)    | 5         | 0.379  |
| Dizziness                        |  | 2(1.18)     | 2         | 1(0.60)     | 1         | 2(1.19)     | 2         | 5(0.99)    | 5         | >0.999 |
| Cough                            |  | 1(0.59)     | 1         | 2(1.20)     | 2         | 1(0.60)     | 1         | 4(0.79)    | 4         | 0.701  |
| Abdominal pain                   |  | 1(0.59)     | 1         | 0           | 0         | 1(0.60)     | 1         | 2(0.40)    | 2         | >0.999 |
| Diarrhea                         |  | 1(0.59)     | 1         | 1(0.60)     | 1         | 0           | 0         | 2(0.40)    | 2         | 0.776  |
| Chest discomfort                 |  | 0           | 0         | 1(0.60)     | 1         | 1(0.60)     | 1         | 2(0.40)    | 2         | 0.553  |
| Sneezing                         |  | 0           | 0         | 1(0.60)     | 1         | 0           | 0         | 1(0.20)    | 1         | 0.331  |
| Insomnia                         |  | 0           | 0         | 1(0.60)     | 1         | 0           | 0         | 1(0.20)    | 1         | 0.331  |
| Dyspepsia                        |  | 0           | 0         | 1(0.60)     | 1         | 0           | 0         | 1(0.20)    | 1         | 0.331  |
| Pruritus                         |  | 1(0.59)     | 1         | 0           | 0         | 0           | 0         | 1(0.20)    | 1         | >0.999 |

Any= all the participants with any adverse reactions. Adverse reactions are adverse events related to vaccination by the judgment of the investigators. Subjects could have more than one adverse reactions. The p values are the comparisons among three batch groups. Comparisons among groups were made using the Chi-square Test or Fisher's Exact Test
