# Supplementary material for: Immunogenicity, Safety, and Immune Persistence of One Dose of SARS-CoV-2 Recombinant Adenovirus Type-5 Vectored Vaccine in Children and Adolescents Aged 6–17 Years: An Immunobridging Trial
Source: MDPI journal article supplement (doi:10.3390/vaccines12060683), 2024-06-19
Supplement: s1 [file s1]

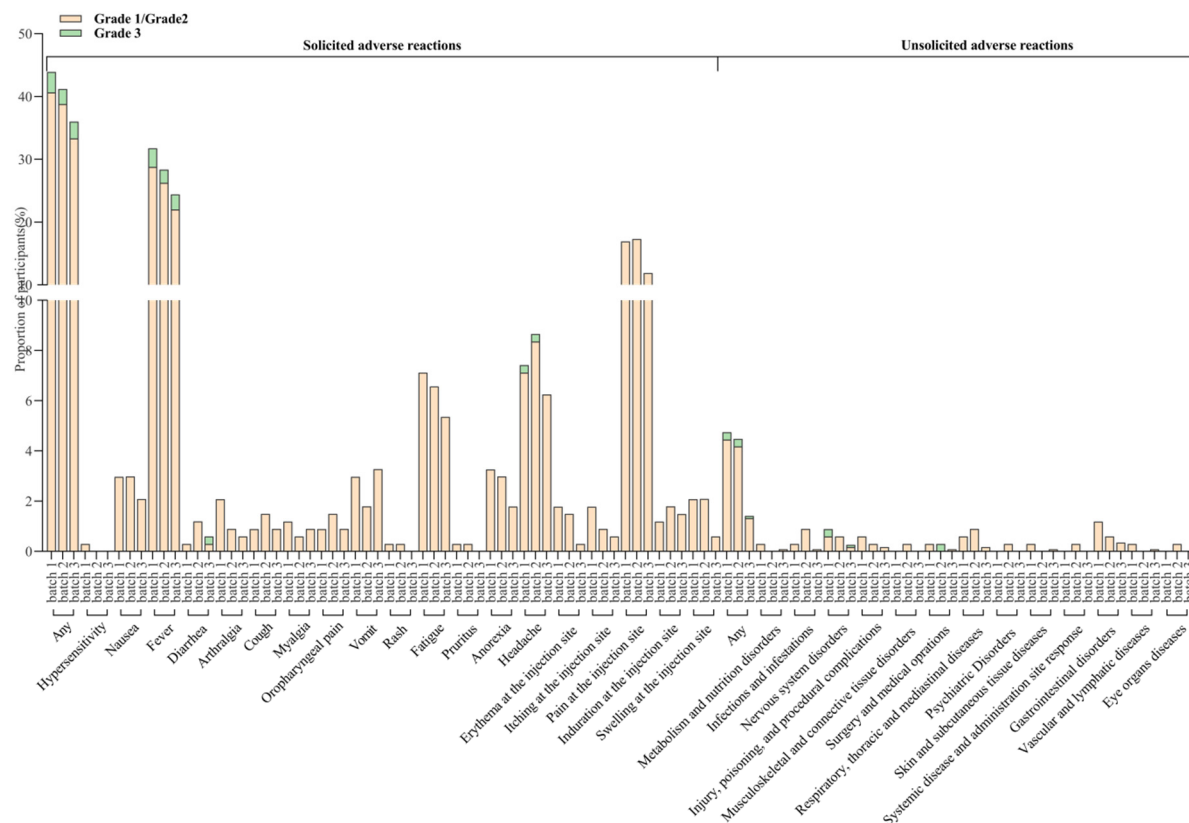

Supplementary Figure S2. Solicited and unsolicited adverse reactions occurred within 28 days after the vaccination in different batches.

Any = all the participants with any adverse reactions. The analysis was based on the safety set cohort, with all participants receiving vaccines after randomization. \* $P$  value <0.05.

Comparisons among groups were made using the Chi-square Test or Fisher's Exact Test.
