# Supplementary material for: Immunogenicity, Safety, and Immune Persistence of One Dose of SARS-CoV-2 Recombinant Adenovirus Type-5 Vectored Vaccine in Children and Adolescents Aged 6–17 Years: An Immunobridging Trial
Source: MDPI journal article supplement (doi:10.3390/vaccines12060683), 2024-06-19
Supplement: s1 [file s1]

Supplementary Table S1. GMTs of Neutralizing Antibodies against SARS-COV-2 (WT) on day 0 or 28 post-vaccination and subgroup by pre-existing anti-Ad5 neutralizing antibody titers. (PPS) (6-17 years old)

|                     | 800L Batch1(N=335) | 800L Batch 2(N=332) | 800L Batch 3(N=334) | Total(N=1001) |
|---------------------|--------------------|---------------------|---------------------|---------------|
| <b>Day 0</b>        |                    |                     |                     |               |
| GMT                 | 2                  | 2                   | 2                   | 2             |
| 95% CI              | 2.0,2.0            | 2.0,2.0             | 2.0,2.0             | 2.0,2.0       |
| <b>Day 28</b>       |                    |                     |                     |               |
| GMT                 | 18.6               | 17.2                | 19.9                | 18.5          |
| 95% CI              | 16.6,20.9          | 15.2,19.4           | 17.6,22.4           | 17.3,19.9     |
| Seroconversion N(%) | 309(92.2)          | 302(91.0)           | 309(92.5)           | 920(91.9)     |
| Seroconversion rate | 88.9,94.7          | 87.4,93.6           | 89.2,94.9           | 90.1,93.4     |
| 95%CI               |                    |                     |                     |               |
| <b>Ad5≤200</b>      |                    |                     |                     |               |
| Day 0               |                    |                     |                     |               |
| GMT                 | 2                  | 2                   | 2                   | 2             |
| 95% CI              | 2.0,2.0            | 2.0,2.0             | 2.0,2.0             | 2.0,2.0       |
| Day 28              |                    |                     |                     |               |
| GMT                 | 32.4               | 33.8                | 33.8                | 33.3          |
| 95% CI              | 28.6,36.8          | 28.6,39.8           | 29.1,39.4           | 30.6,36.2     |
| <b>Ad5 &gt; 200</b> |                    |                     |                     |               |
| Day 0               |                    |                     |                     |               |
| GMT                 | 2                  | 2                   | 2                   | 2             |
| 95% CI              | 2.0,2.0            | 2.0,2.0             | 2.0,2.0             | 2.0,2.0       |
| Day 28              |                    |                     |                     |               |
| GMT                 | 11.3               | 10.4                | 12.9                | 11.5          |
| 95% CI              | 9.7,13.2           | 9.0,11.9            | 11.0,15.1           | 10.5,12.5     |

GMT=geometric mean titer, CI: confidence interval. Seroconversion was defined as participants with detectable neutralizing antibodies if baseline titers were undetectable, or at least a four-fold increase of neutralizing antibodies from the baseline level.
