# Supplementary material for: Immunogenicity, Safety, and Immune Persistence of One Dose of SARS-CoV-2 Recombinant Adenovirus Type-5 Vectored Vaccine in Children and Adolescents Aged 6–17 Years: An Immunobridging Trial
Source: MDPI journal article supplement (doi:10.3390/vaccines12060683), 2024-06-19
Supplement: s1 [file s1]

Supplementary Table S3. Adverse Reactions were stratified by age and time

|                 |  | 800L Batch1 |           | 800L Batch2 |           | 800L Batch3 |           | Total      |           | P     |
|-----------------|--|-------------|-----------|-------------|-----------|-------------|-----------|------------|-----------|-------|
|                 |  | (N=337)     |           | (N=335)     |           | (N=336)     |           | (N=1008)   |           |       |
|                 |  | n(%)        | Frequency | n(%)        | Frequency | n(%)        | Frequency | n(%)       | Frequency |       |
| AR              |  | 145(43.03)  | 293       | 133(39.70)  | 278       | 121(36.01)  | 214       | 399(39.58) | 785       | 0.177 |
| AR within 30min |  | 25(7.42)    | 31        | 15(4.48)    | 16        | 15(4.46)    | 16        | 55(5.46)   | 63        | 0.151 |
| AR (0-7days)    |  | 145(43.03)  | 293       | 133(39.70)  | 278       | 121(36.01)  | 214       | 399(39.58) | 785       | 0.177 |
| AR (8-28days)   |  | 0           | 0         | 0           | 0         | 0           | 0         | 0          | 0         | —     |
| 13-17 years old |  |             |           |             |           |             |           |            |           |       |
| AR              |  | 70(41.42)   | 140       | 56(33.53)   | 110       | 55(32.74)   | 101       | 181(35.91) | 351       | 0.185 |
| AR within 30min |  | 17(10.06)   | 18        | 13(7.78)    | 13        | 11(6.55)    | 11        | 41(8.13)   | 42        | 0.489 |
| AR (0-7days)    |  | 70(41.42)   | 140       | 56(33.53)   | 110       | 55(32.74)   | 101       | 181(35.91) | 351       | 0.185 |
| AR (8-28days)   |  | 0           | 0         | 0           | 0         | 0           | 0         | 0          | 0         | -     |
| 6-12 years old  |  |             |           |             |           |             |           |            |           |       |
| AR              |  | 75(44.64)   | 153       | 77(45.83)   | 168       | 66(39.29)   | 113       | 218(43.25) | 434       | 0.435 |
| AR within 30min |  | 8(4.76)     | 12        | 2(1.19)     | 3         | 4(2.38)     | 5         | 14(2.78)   | 20        | 0.159 |
| AR (0-7days)    |  | 75(44.64)   | 153       | 77(45.83)   | 168       | 66(39.29)   | 113       | 218(43.25) | 434       | 0.435 |
| AR (8-28days)   |  | 0           | 0         | 0           | 0         | 0           | 0         | 0          | 0         | -     |

Adverse Reactions (AR) are adverse events related to vaccination by the judgment of the investigators. Subjects could have more than one adverse reaction. The p values are the comparisons among three batch groups. Comparisons among groups were made using the Chi-square Test or Fisher's Exact Test
