# Supplementary material for: Immunogenicity, Safety, and Immune Persistence of One Dose of SARS-CoV-2 Recombinant Adenovirus Type-5 Vectored Vaccine in Children and Adolescents Aged 6–17 Years: An Immunobridging Trial
Source: MDPI journal article supplement (doi:10.3390/vaccines12060683), 2024-06-19
Supplement: s1 [file s1]

Supplementary Table S4. Local or systemic adverse reactions occurred within 7 days after the vaccination across three batch group (6-17 years old)

|                  |                       | 800L Batch1 |           | 800L Batch2 |           | 800L Batch3 |           | Total      |           | P      |
|------------------|-----------------------|-------------|-----------|-------------|-----------|-------------|-----------|------------|-----------|--------|
|                  |                       | (N=337)     |           | (N=335)     |           | (N=336)     |           | (N=1008)   |           |        |
|                  |                       | n(%)        | Frequency | n(%)        | Frequency | n(%)        | Frequency | n(%)       | Frequency |        |
| Any              |                       | 145(43.03)  | 293       | 133(39.70)  | 278       | 121(36.01)  | 214       | 399(39.58) | 785       | 0.177  |
| Local            | adverse reactions     | 59(17.51)   | 81        | 61(18.21)   | 80        | 42(12.50)   | 50        | 162(16.07) | 211       | 0.089  |
| Pain             | at the injection site | 57(16.91)   | 57        | 58(17.31)   | 58        | 40(11.90)   | 40        | 155(15.38) | 155       | 0.096  |
| Swelling         | at the injection site | 7(2.08)     | 7         | 7(2.09)     | 7         | 2(0.60)     | 2         | 16(1.59)   | 16        | 0.204  |
| Induration       | at the injection site | 4(1.19)     | 4         | 6(1.79)     | 6         | 5(1.49)     | 5         | 15(1.49)   | 15        | 0.811  |
| Erythema         | at the injection site | 6(1.78)     | 6         | 5(1.49)     | 5         | 1(0.30)     | 1         | 12(1.19)   | 12        | 0.153  |
| Itching          | at the injection site | 6(1.78)     | 6         | 3(0.90)     | 3         | 2(0.60)     | 2         | 11(1.09)   | 11        | 0.383  |
| Rash             |                       | 1(0.30)     | 1         | 1(0.30)     | 1         | 0           | 0         | 2(0.20)    | 2         | 0.777  |
| Systemic         | adverse reactions     | 117(34.72)  | 212       | 108(32.24)  | 198       | 99(29.46)   | 164       | 324(32.14) | 574       | 0.344  |
| Fever            |                       | 107(31.75)  | 108       | 94(28.06)   | 96        | 82(24.40)   | 82        | 283(28.08) | 286       | 0.106  |
| Headache         |                       | 25(7.42)    | 25        | 28(8.36)    | 28        | 21(6.25)    | 21        | 74(7.34)   | 74        | 0.577  |
| Fatigue          |                       | 24(7.12)    | 24        | 22(6.57)    | 22        | 18(5.36)    | 18        | 64(6.35)   | 64        | 0.631  |
| Anorexia         |                       | 11(3.26)    | 11        | 10(2.99)    | 10        | 6(1.79)     | 6         | 27(2.68)   | 27        | 0.451  |
| Nausea           |                       | 10(2.97)    | 10        | 9(2.69)     | 9         | 7(2.08)     | 7         | 26(2.58)   | 26        | 0.761  |
| Vomit            |                       | 9(2.67)     | 9         | 6(1.79)     | 6         | 11(3.27)    | 11        | 26(2.58)   | 26        | 0.476  |
| Arthralgia       |                       | 7(2.08)     | 7         | 4(1.19)     | 4         | 2(0.60)     | 2         | 13(1.29)   | 13        | 0.248  |
| Oropharyngeal    | pain                  | 3(0.89)     | 3         | 5(1.49)     | 5         | 3(0.89)     | 3         | 11(1.09)   | 11        | 0.697  |
| Myalgia          |                       | 4(1.19)     | 4         | 2(0.60)     | 2         | 3(0.89)     | 3         | 9(0.89)    | 9         | 0.914  |
| Cough            |                       | 2(0.59)     | 2         | 4(1.19)     | 4         | 3(0.89)     | 3         | 9(0.89)    | 9         | 0.592  |
| Dizziness        |                       | 3(0.89)     | 3         | 2(0.60)     | 2         | 3(0.89)     | 3         | 8(0.79)    | 8         | >0.999 |
| Diarrhea         |                       | 1(0.30)     | 1         | 2(0.60)     | 2         | 2(0.60)     | 2         | 5(0.50)    | 5         | 0.752  |
| Abdominal pain   |                       | 1(0.30)     | 1         | 0           | 0         | 2(0.60)     | 2         | 3(0.30)    | 3         | 0.665  |
| Chest            | discomfort            | 0           | 0         | 1(0.30)     | 1         | 1(0.30)     | 1         | 2(0.20)    | 2         | 0.554  |
| Pruritus         |                       | 1(0.30)     | 1         | 1(0.30)     | 1         | 0           | 0         | 2(0.20)    | 2         | 0.777  |
| Hypersensitivity |                       | 1(0.30)     | 1         | 0           | 0         | 0           | 0         | 1(0.10)    | 1         | >0.999 |
| Abdominal        | discomfort            | 0           | 0         | 1(0.30)     | 1         | 0           | 0         | 1(0.10)    | 1         | 0.332  |
| Erythema         |                       | 1(0.30)     | 1         | 0           | 0         | 0           | 0         | 1(0.10)    | 1         | >0.999 |
| Dental ulcer     |                       | 1(0.30)     | 1         | 0           | 0         | 0           | 0         | 1(0.10)    | 1         | >0.999 |

|                       |   |   |         |   |   |   |         |   |       |
|-----------------------|---|---|---------|---|---|---|---------|---|-------|
| Sneezing              | 0 | 0 | 1(0.30) | 1 | 0 | 0 | 1(0.10) | 1 | 0.332 |
| Insomnia              | 0 | 0 | 1(0.30) | 1 | 0 | 0 | 1(0.10) | 1 | 0.332 |
| Dyspepsia             | 0 | 0 | 1(0.30) | 1 | 0 | 0 | 1(0.10) | 1 | 0.332 |
| Congestion of the eye | 0 | 0 | 1(0.30) | 2 | 0 | 0 | 1(0.10) | 2 | 0.332 |

---

Any= all the participants with any adverse reactions. Adverse reactions are adverse events related to vaccination by the judgment of the investigators. Subjects could have more than one adverse reactions. The p values are the comparisons among three batch groups. Comparisons among groups were made using the Chi-square Test or Fisher's Exact Test
