# Supplementary material for: Immunogenicity, Safety, and Immune Persistence of One Dose of SARS-CoV-2 Recombinant Adenovirus Type-5 Vectored Vaccine in Children and Adolescents Aged 6–17 Years: An Immunobridging Trial
Source: MDPI journal article supplement (doi:10.3390/vaccines12060683), 2024-06-19
Supplement: s1 [file s1]

Supplementary Table S2. GMCs, 95%CI and seroconversion rates of SARS-CoV-2 RBD-specific IgG on day 0 or 28 post-vaccination and subgroup by pre-existing anti-Ad5 neutralizing antibody titers. (PPS) (6-17 years old).

|                           | 800L Batch1(N=335) | 800L Batch 2(N=332) | 800L Batch 3(N=334) | Total(N=1001) |
|---------------------------|--------------------|---------------------|---------------------|---------------|
| <b>Day 0</b>              |                    |                     |                     |               |
| GMC                       | 10                 | 10                  | 10                  | 10            |
| 95% CI                    | 10.0,10.1          | 10.0,10.0           | 10.0,10.0           | 10.0,10.0     |
| <b>Day 28</b>             |                    |                     |                     |               |
| GMC                       | 179.4              | 161.6               | 169.8               | 170.1         |
| 95% CI                    | 159.9,201.3        | 143.8,181.5         | 151.2,190.7         | 159.2,181.9   |
| Seroconversion            |                    |                     |                     |               |
| Seroconversion N (%)      | 326(97.3)          | 320(96.4)           | 322(96.4)           | 968(96.7)     |
| Seroconversion rate 95%CI | 95.0,98.6          | 93.8,97.9           | 93.8,97.9           | 95.4,97.6     |
| <b>Ad5≤200</b>            |                    |                     |                     |               |
| Day 0                     |                    |                     |                     |               |
| GMC                       | 10                 | 10                  | 10                  | 10            |
| 95% CI                    | 10.0,10.0          | 10.0,10.0           | 10.0,10.0           | 10.0,10.0     |
| Day 28                    |                    |                     |                     |               |
| GMC                       | 345.4              | 333.3               | 307.7               | 328.6         |
| 95% CI                    | 309.8,385.1        | 295.6,375.7         | 271.0,349.3         | 307.0,351.8   |
| <b>Ad5 &gt; 200</b>       |                    |                     |                     |               |
| Day 0                     |                    |                     |                     |               |
| GMC                       | 10.1               | 10                  | 10                  | 10            |
| 95% CI                    | 9.9,10.2           | 10.0,10.0           | 10.0,10.0           | 10.0,10.1     |
| Day 28                    |                    |                     |                     |               |
| GMC                       | 100                | 94                  | 104.6               | 99.4          |
| 95% CI                    | 86.1,116.2         | 81.8,108.2          | 89.9,121.7          | 91.3,108.2    |

GMC: geometric mean concentration, CI: confidence interval. Seroconversion was defined as participants with detectable ELISA antibodies if baseline titers were undetectable, or at least a four-fold increase of RBD-specific antibodies from the baseline level.
