# Supplementary material for: Immunogenicity, Safety, and Immune Persistence of One Dose of SARS-CoV-2 Recombinant Adenovirus Type-5 Vectored Vaccine in Children and Adolescents Aged 6–17 Years: An Immunobridging Trial
Source: MDPI journal article supplement (doi:10.3390/vaccines12060683), 2024-06-19
Supplement: s1 [file s1]

Supplementary Table S6. Local or systemic adverse reactions occurred within 7 days after the vaccination across three batch group (6-12 years old)

|                                  |  | 800L Batch1 |           | 800L Batch2 |           | 800L Batch3 |           | Total      |           | P      |
|----------------------------------|--|-------------|-----------|-------------|-----------|-------------|-----------|------------|-----------|--------|
|                                  |  | (N=168)     |           | (N=168)     |           | (N=168)     |           | (N=504)    |           |        |
|                                  |  | n(%)        | Frequency | n(%)        | Frequency | n(%)        | Frequency | n(%)       | Frequency |        |
| Any                              |  | 75(44.64)   | 153       | 77(45.83)   | 168       | 66(39.29)   | 113       | 218(43.25) | 434       | 0.435  |
| Local adverse reactions          |  | 25(14.88)   | 41        | 29(17.26)   | 42        | 14(8.33)    | 17        | 68(13.49)  | 100       | 0.046  |
| Pain at the injection site       |  | 23(13.69)   | 23        | 26(15.48)   | 26        | 13(7.74)    | 13        | 62(12.30)  | 62        | 0.078  |
| Swelling at the injection site   |  | 6(3.57)     | 6         | 6(3.57)     | 6         | 1(0.60)     | 1         | 13(2.58)   | 13        | 0.117  |
| Induration at the injection site |  | 4(2.38)     | 4         | 4(2.38)     | 4         | 1(0.60)     | 1         | 9(1.79)    | 9         | 0.409  |
| Erythema at the injection site   |  | 4(2.38)     | 4         | 3(1.79)     | 3         | 1(0.60)     | 1         | 8(1.59)    | 8         | 0.547  |
| Itching at the injection site    |  | 3(1.79)     | 3         | 2(1.19)     | 2         | 1(0.60)     | 1         | 6(1.19)    | 6         | 0.875  |
| Rash                             |  | 1(0.60)     | 1         | 1(0.60)     | 1         | 0           | 0         | 2(0.40)    | 2         | >0.999 |
| Systemic adverse reactions       |  | 62(36.90)   | 112       | 70(41.67)   | 126       | 60(35.71)   | 96        | 192(38.10) | 334       | 0.493  |
| Fever                            |  | 56(33.33)   | 56        | 65(38.69)   | 66        | 53(31.55)   | 53        | 174(34.52) | 175       | 0.358  |
| Headache                         |  | 14(8.33)    | 14        | 16(9.52)    | 16        | 12(7.14)    | 12        | 42(8.33)   | 42        | 0.732  |
| Fatigue                          |  | 11(6.55)    | 11        | 12(7.14)    | 12        | 9(5.36)     | 9         | 32(6.35)   | 32        | 0.792  |
| Anorexia                         |  | 7(4.17)     | 7         | 7(4.17)     | 7         | 3(1.79)     | 3         | 17(3.37)   | 17        | 0.378  |
| Nausea                           |  | 7(4.17)     | 7         | 6(3.57)     | 6         | 3(1.79)     | 3         | 16(3.17)   | 16        | 0.432  |
| Vomit                            |  | 5(2.98)     | 5         | 5(2.98)     | 5         | 6(3.57)     | 6         | 16(3.17)   | 16        | 0.937  |
| Arthralgia                       |  | 4(2.38)     | 4         | 3(1.79)     | 3         | 1(0.60)     | 1         | 8(1.59)    | 8         | 0.547  |
| Cough                            |  | 1(0.60)     | 1         | 2(1.19)     | 2         | 2(1.19)     | 2         | 5(0.99)    | 5         | >0.999 |
| Oropharyngeal pain               |  | 2(1.19)     | 2         | 1(0.60)     | 1         | 2(1.19)     | 2         | 5(0.99)    | 5         | >0.999 |
| Myalgia                          |  | 1(0.60)     | 1         | 2(1.19)     | 2         | 1(0.60)     | 1         | 4(0.79)    | 4         | >0.999 |
| Diarrhea                         |  | 0           | 0         | 1(0.60)     | 1         | 2(1.19)     | 2         | 3(0.60)    | 3         | 0.776  |
| Dizziness                        |  | 1(0.60)     | 1         | 1(0.60)     | 1         | 1(0.60)     | 1         | 3(0.60)    | 3         | >0.999 |
| Hypersensitivity                 |  | 1(0.60)     | 1         | 0           | 0         | 0           | 0         | 1(0.20)    | 1         | >0.999 |
| Abdominal discomfort             |  | 0           | 0         | 1(0.60)     | 1         | 0           | 0         | 1(0.20)    | 1         | >0.999 |
| Abdominal pain                   |  | 0           | 0         | 0           | 0         | 1(0.60)     | 1         | 1(0.20)    | 1         | >0.999 |
| Erythema                         |  | 1(0.60)     | 1         | 0           | 0         | 0           | 0         | 1(0.20)    | 1         | >0.999 |
| Dental ulcer                     |  | 1(0.60)     | 1         | 0           | 0         | 0           | 0         | 1(0.20)    | 1         | >0.999 |
| Congestion of the eye            |  | 0           | 0         | 1(0.60)     | 2         | 0           | 0         | 1(0.20)    | 2         | >0.999 |
| Pruritus                         |  | 0           | 0         | 1(0.60)     | 1         | 0           | 0         | 1(0.20)    | 1         | >0.999 |

Any= all the participants with any adverse reactions. Adverse reactions are adverse events related

to vaccination by the judgment of the investigators. Subjects could have more than one adverse reactions. The p values are the comparisons among three batch groups. Comparisons among groups were made using the Chi-square Test or Fisher's Exact Test
