# Supplementary material for: Immunogenicity, Safety, and Immune Persistence of One Dose of SARS-CoV-2 Recombinant Adenovirus Type-5 Vectored Vaccine in Children and Adolescents Aged 6–17 Years: An Immunobridging Trial
Source: MDPI journal article supplement (doi:10.3390/vaccines12060683), 2024-06-19
Supplement: s1 [file s1]

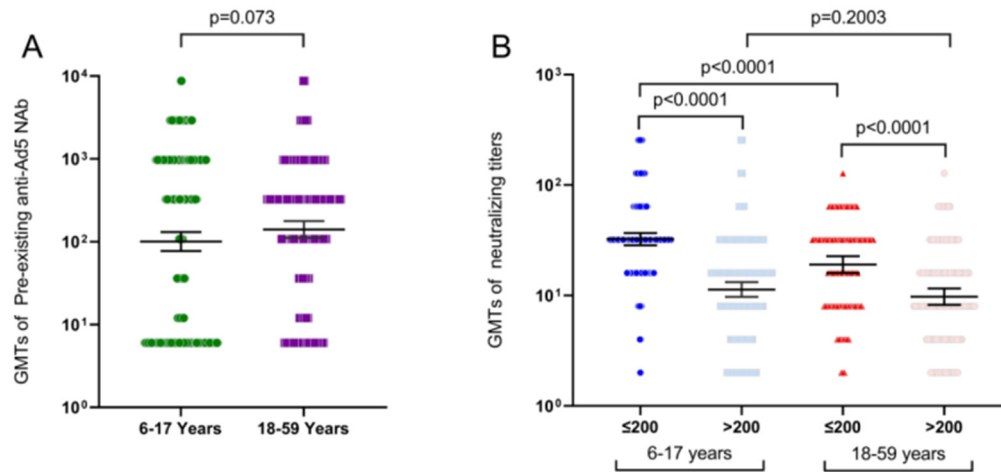

Supplementary Figure S1. A: GMTs of preexisting anti-Ad5 neutralizing antibody on day 0. B: GMTs of SARS-CoV-2 neutralizing antibodies on day 28 post-vaccination with preexisting anti-Ad5 neutralizing antibody titers  $\leq 200$  or titers  $> 200$ .

The analysis was based on the per protocol set (PPS), included all randomized participants who received the vaccination and completed the follow-up of 28 days in accordance with the protocol. GMT = geometric mean titers. Error bars are GMT with two-sided 95% CIs.

Comparing between the two groups, the log-converted data was analyzed by T-test.
